# Supplementary material
Source: publisher site journal article supplement (https://www.dovepress.com/article/278002)
Supplement: Supplementary file 1 [file get_supplementary_file.php]

**Supplementary Figures**

**Fig S1**


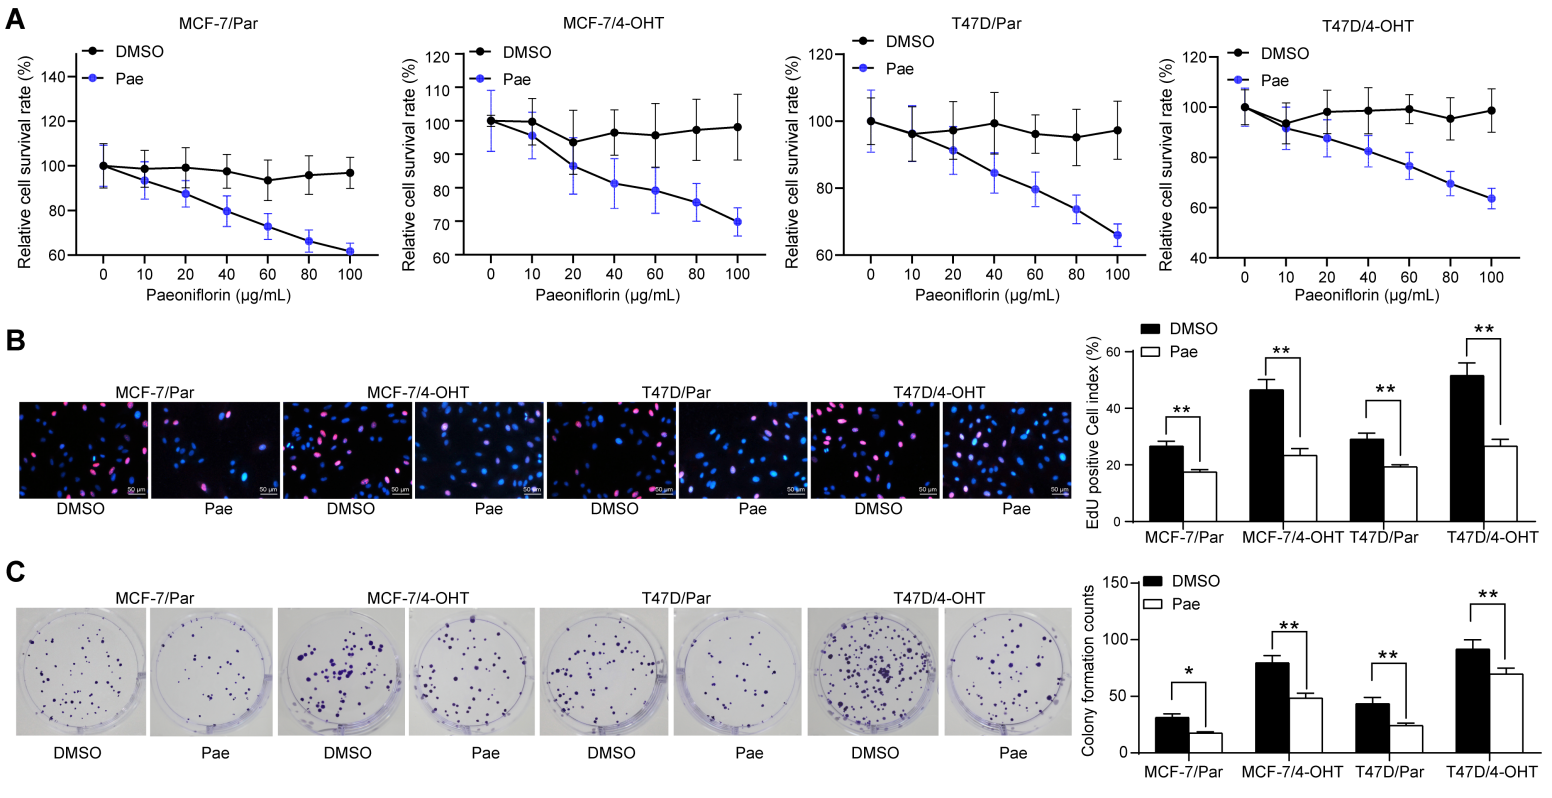


**Fig S1.** Pae treatment inhibits BC cell activity. A, MCF-7/Par, MCF-7/Tam, T47D/Par and T47D/Tam cell survival tested with CCK-8 kits in response to 0-100 μg/mL Pae; B, EdU positive cell rate in MCF-7/Par, MCF-7/Tam, T47D/Par and T47D/Tam cells in response to 100 μg/mL Pae; C, the colony formation capacities of MCF-7/Par, MCF-7/Tam, T47D/Par and T47D/Tam cells MCF-7/Par, MCF-7/Tam, T47D/Par and T47D/Tam cell. Data are displayed in the form of mean ± SD. All experiments were repeated three times. Two-way ANOVA along with Tukey’s multiple comparison was applied. **p* < 0.05, ***p* < 0.01.

**Fig S2**


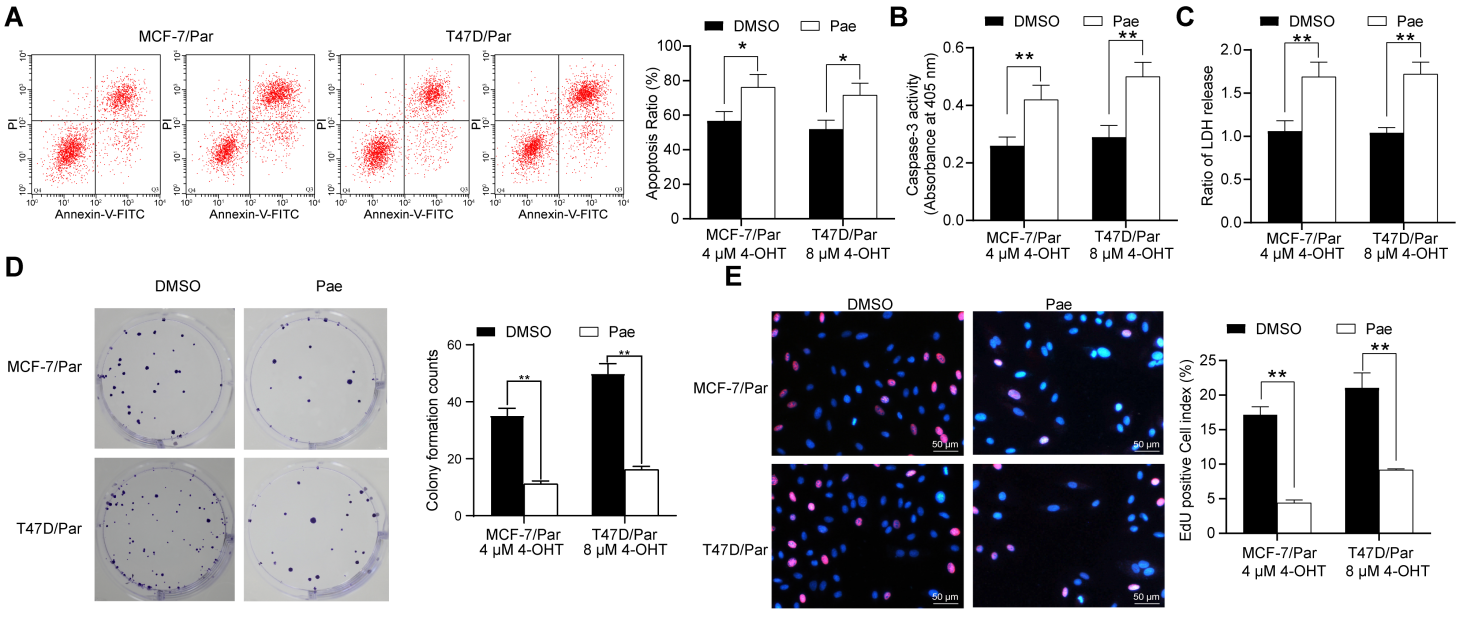


**Fig S2.** Pae treatment sensitizes MCF-7 and T47D parental cells to Tam. A, the apoptosis levels of MCF-7/Par and T47D/Par cells under Pae exposure (100 μg/mL) detected by flow cytometry under treatment of 4 μM and 8 μM Tam, respectively; B, the apoptosis levels of MCF-7/Par and T47D/Par cells under Pae exposure (100 μg/mL) assessed by Caspase-3 activity kit; C, the cytotoxicity of Tam to MCF-7/Par and T47D/Par cells under Pae exposure (100 μg/mL) determined by a LDH kit; D, colony formation of MCF-7/Par and T47D/Par cells under Pae exposure (100 μg/mL) tested by colony formation assays; E, number of S-phase cells under Pae exposure (100 μg/mL) detected by EdU assays. Data are displayed in the form of mean ± SD. All experiments were repeated three times. Two-way ANOVA along with Tukey’s multiple comparison was applied. **p* < 0.05, ***p* < 0.01.

**Fig S3**

**
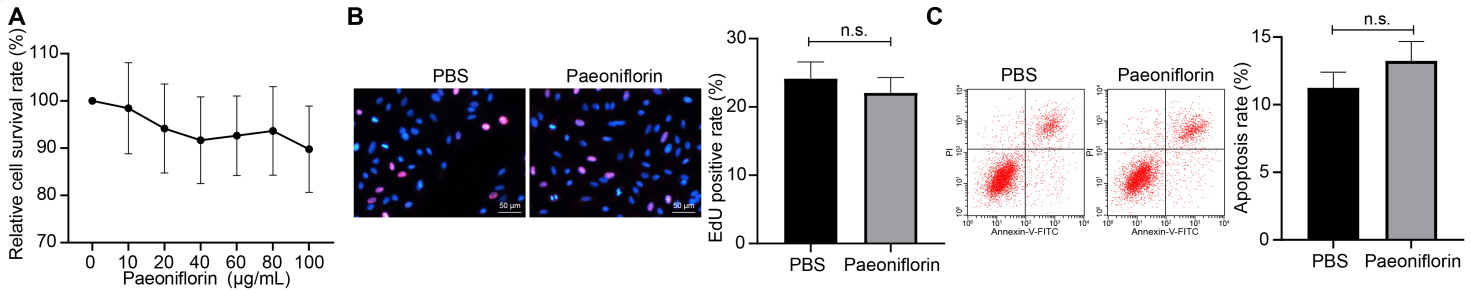
**

**Fig S3** Pae treatment does not affect the activity of MCF10A cell.A, MCF10A cell activity assessment examined by CCK-8 kits after a gradient of concentrations of Pae treatment; B, EdU staining for cell proliferation capacity after Pae treatment at 100 μg/mL; C, flow cytometry detection of the apoptotic percentage of MCF10A cells after Pae treatment at 100 μg/mL. Data are displayed in the form of mean ± SD. All experiments were repeated at least three times. unpaired *t* test was used. n.s no significance.

**Fig S4**

**
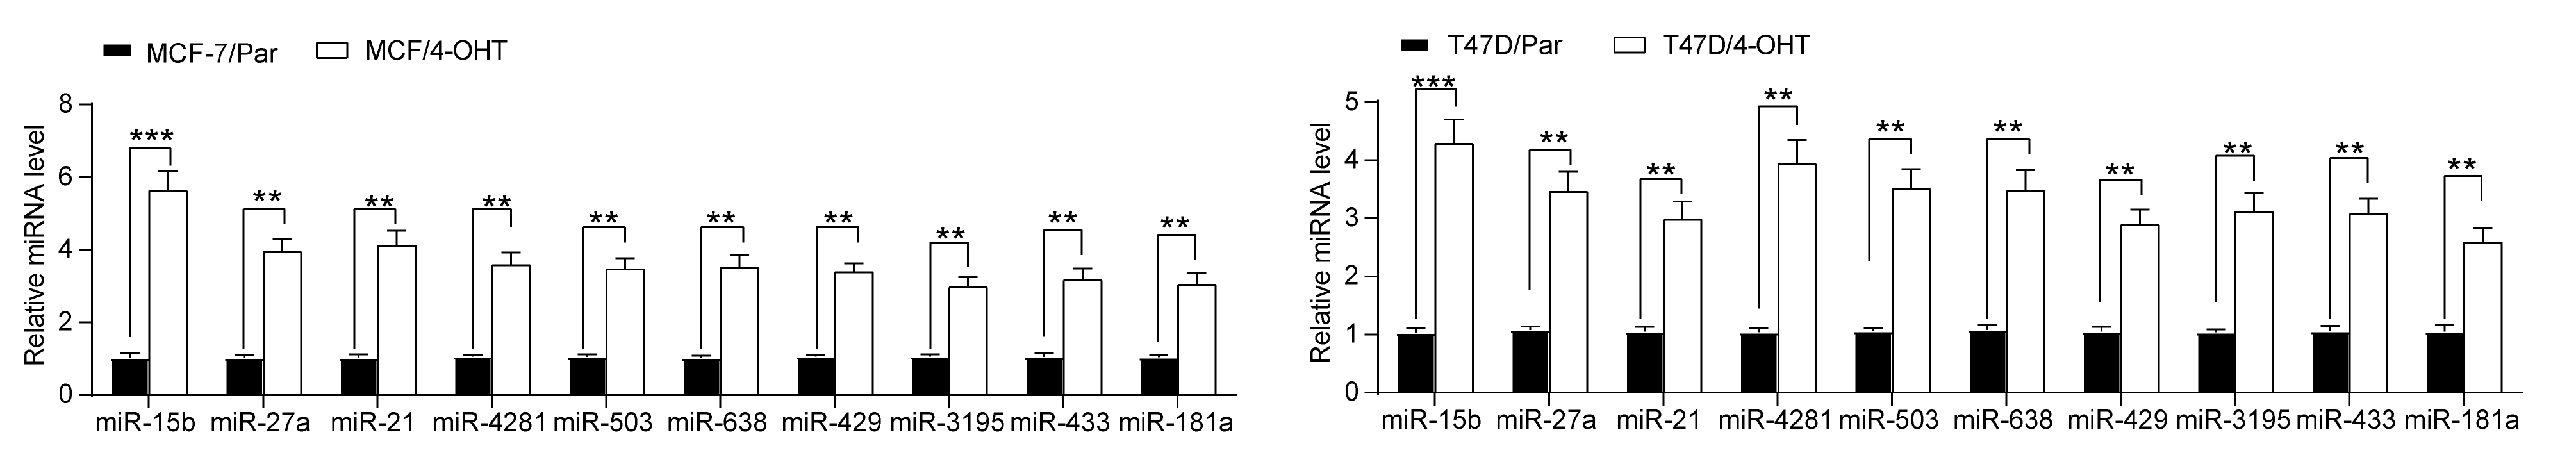
**

**Fig S4.** miR-15b is significantly higher in Tam-resistant cells.The expression of these 10 differentially expressed miRNAs between MCF-7/Par and MCF-7/Tam as well as T47D/Par and T47D/Tam. Data are displayed in the form of mean ± SD. All experiments were repeated three times. Two-way ANOVA along with Tukey’s multiple comparison was applied. ***p* < 0.01, ****p* < 0.001.

**Fig S5**


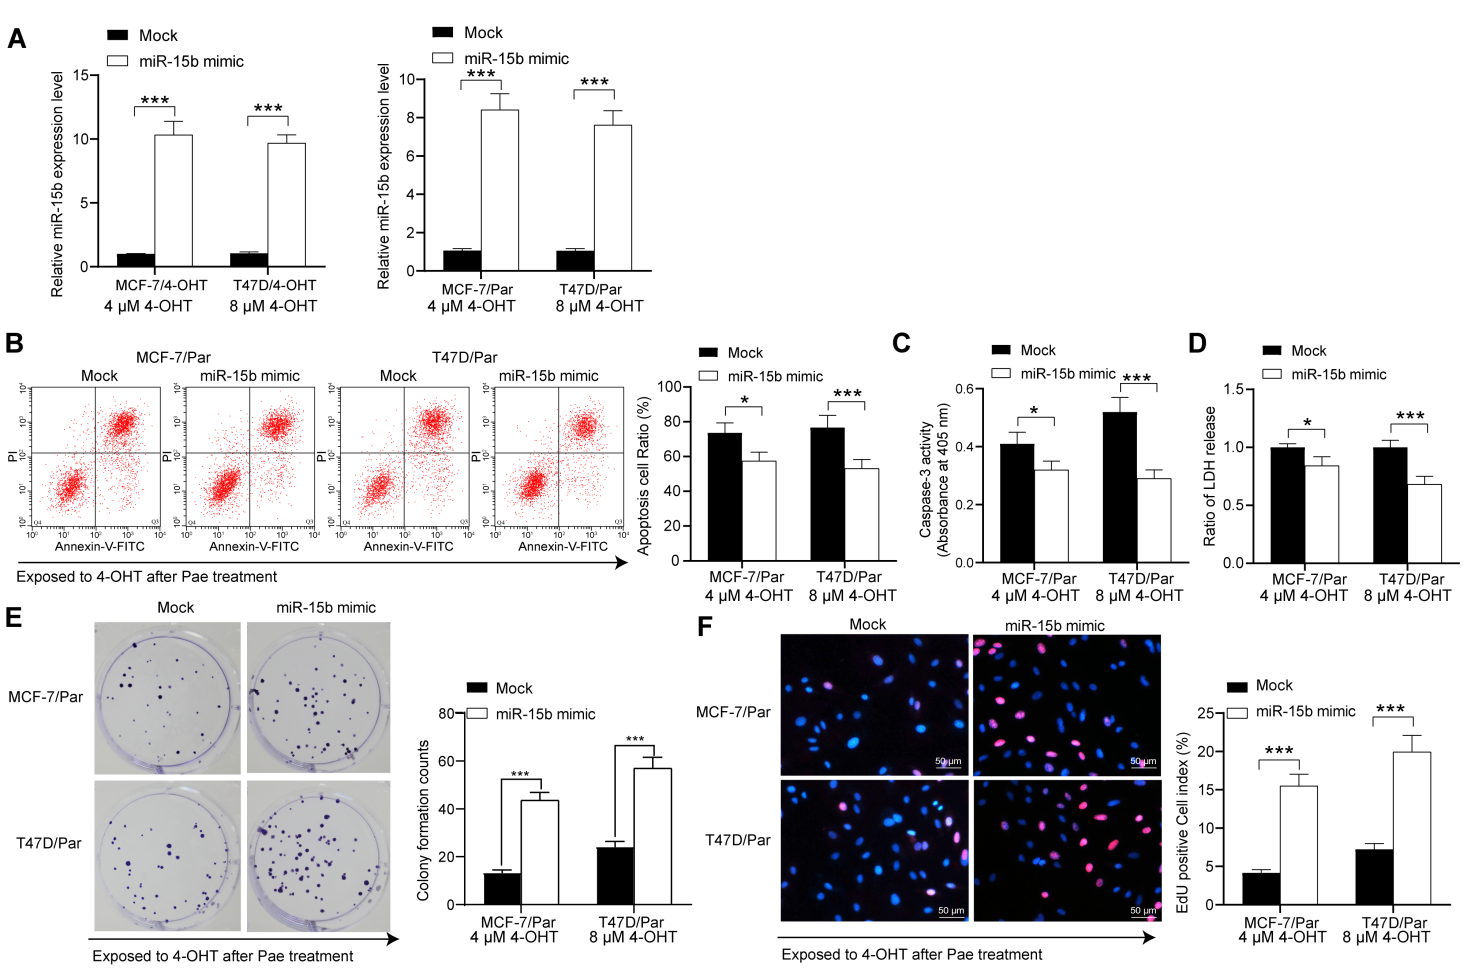


**Fig S5.** miR-15b mimic confers BC cells resistance to 4-OHT. miR-15b mimic was transfected into parents and resistant MCF-7 and T47D cells. A, the expression of miR-15b in cells detected by RT-qPCR; B, the apoptosis levels of MCF-7/Par and T47D/Par cells after transfection detected by flow cytometry; C, the apoptosis levels of MCF-7/Par and T47D/Par cells after transfection assessed by Caspase-3 activity kit; D, the cytotoxicity of Tam to MCF-7/Par and T47D/Par cells after transfection determined by a LDH kit; E, colony formation of MCF-7/Par and T47D/Par cells after transfection tested by colony formation assays; F, number of S-phase cells after transfection detected by EdU assays. Data are displayed in the form of mean ± SD. All experiments were repeated three times. Two-way ANOVA along with Tukey’s multiple comparison was applied. **p* < 0.05, ****p* < 0.001.

**Fig S6**


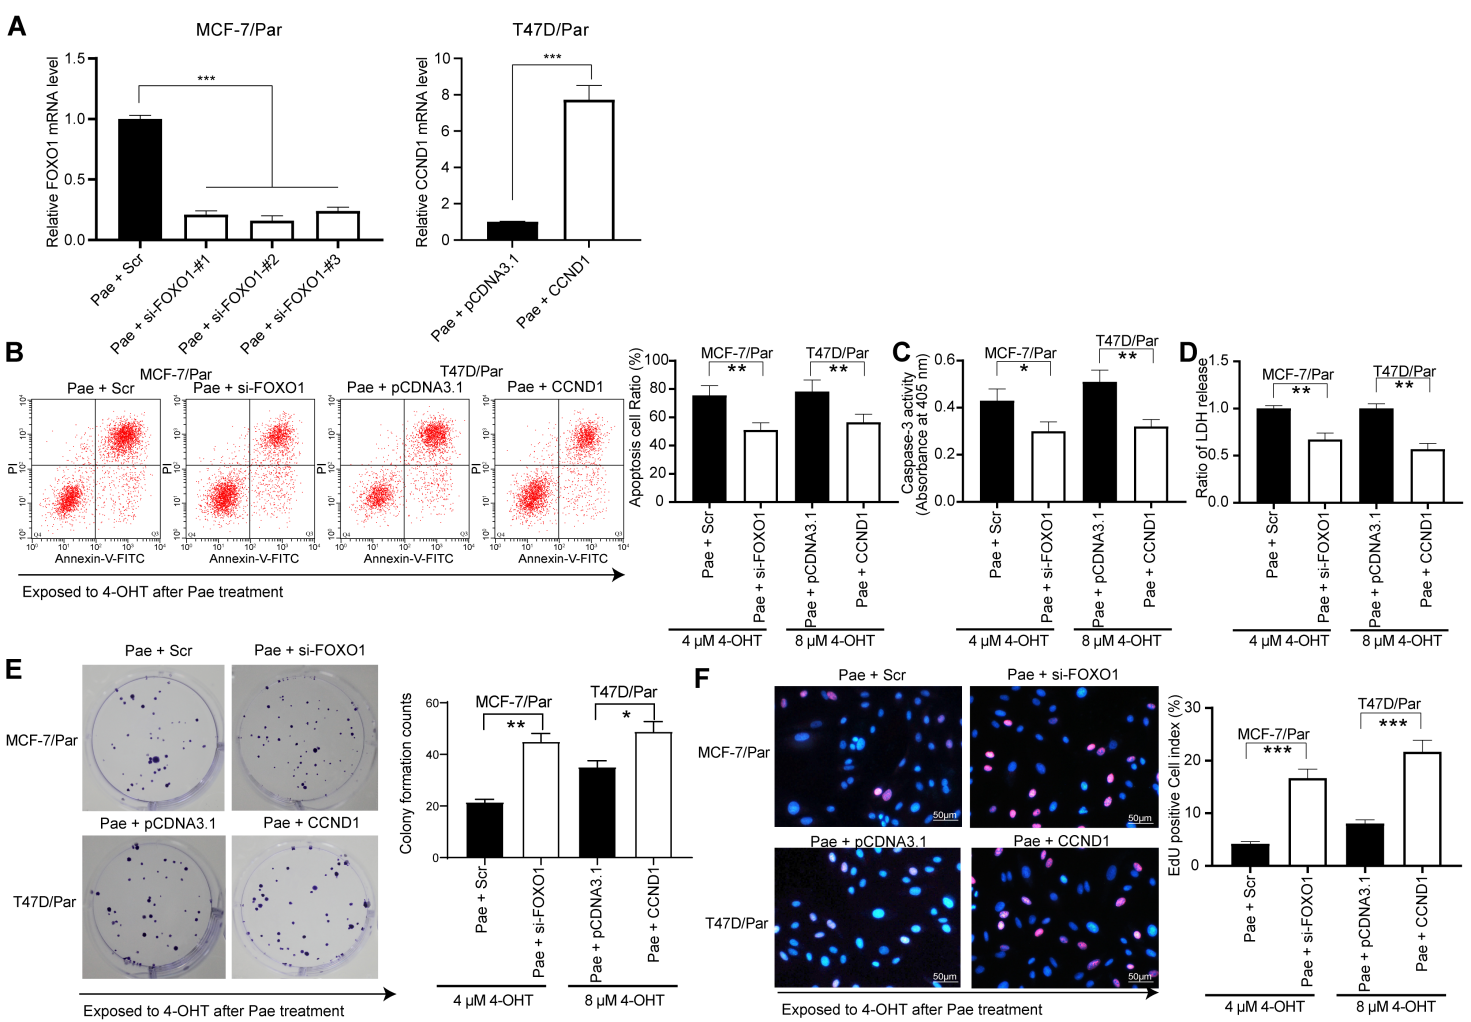


**Fig S6.** si-FOXO1 or overexpression of CCND1 inhibits the repressive role of Pae in resistance to Tam in BC. MCF-7/Par cells were treated with si-FOXO1 with Scr as a control, while T47D/Par cells were transfected with CCND1 with pcDNA3.1 as a control. A, the expression of FOXO1 or CCND1 mRNA in MCF-7/Par and T47D/Par cells assayed by RT-qPCR; B, the apoptosis levels of MCF-7/Par and T47D/Par in the presence of 100 μg/mL Pae detected by flow cytometry; C, the apoptosis levels of MCF-7/Par and T47D/Par in the presence of 100 μg/mL Pae assessed by Caspase-3 activity kit; D, the cytotoxicity of MCF-7/Par and T47D/Par in the presence of 100 μg/mL Pae determined by a LDH kit; E, colony formation of MCF-7/Par and T47D/Par in the presence of 100 μg/mL Pae tested by colony formation assays; F, number of S-phase cells transfected with si-FOXO1 or CCND1 in the presence of 100 μg/mL Pae detected by EdU assays. Data are displayed in the form of mean ± SD. All experiments were repeated at least three times. One-way ANOVA along with Tukey’s multiple comparison was used. **p* < 0.05, ***p* < 0.01, ****p* < 0.001.
